# Supplementary material for: Development of a Stable Peptide-Based PET Tracer for Detecting CD133-Expressing Cancer Cells
Source: PubMed Central journal article supplement — ACS Omega. 2021 Dec 22;7(1):334–41. doi: 10.1021/acsomega.1c04711 (PMC8756568; doi:10.1021/acsomega.1c04711), 2021-12-22
Supplement: ao1c04711_si_001.pdf [file ao1c04711_si_001.pdf]

# Supporting information

## Development of a stable peptide-based PET tracer for detecting CD133-expressing cancer cells

Kuan Hu<sup>1,#</sup>, Xiaohui Ma<sup>3,#</sup>, Lin Xie<sup>1</sup>, Yiding Zhang<sup>1</sup>, Masayuki Hanyu<sup>1</sup>, Honoka Obata<sup>1</sup>, Lulu Zhang<sup>1</sup>, Kotaro Nagatsu<sup>1</sup>, Hisashi Suzuki<sup>1</sup>, Rui Shi<sup>4,\*</sup>, Weizhi Wang<sup>2,\*</sup>, Ming-Rong Zhang<sup>1,\*</sup>

<sup>1</sup>Department of Advanced Nuclear Medicine Sciences, National Institute of Radiological Sciences, National Institutes for Quantum and Radiological Science and Technology, Chiba, 263-8555, Japan.

<sup>2</sup>School of Chemistry and Chemical Engineering, Beijing Institute of Technology, Beijing 100081, P. R. China.

<sup>3</sup>Department of Vascular Surgery, General Hospital of People's Liberation Army, Beijing 100853, P. R. China

<sup>4</sup>Institute of Traumatology and Orthopaedics Beijing Jishuitan Hospital Beijing Laboratory of Biomedical Materials Beijing 100035, P. R. China

## Contents

|                                                                                    |    |
|------------------------------------------------------------------------------------|----|
| 1. Solid-phase peptide synthesis of radiotracer precursors.....                    | 2  |
| 2. PET quantification of region of interest and ex vivo biodistribution data ..... | 4  |
| 3. Summary of the characteristics of the reported CD133 radiotracers .....         | 6  |
| 4. Summary of the peptide precursors .....                                         | 6  |
| 5. Supplementary figures.....                                                      | 7  |
| 6. Supplementary HPLC curves and mass spectra .....                                | 13 |

# 1. Solid-phase peptide synthesis of radiotracer precursors

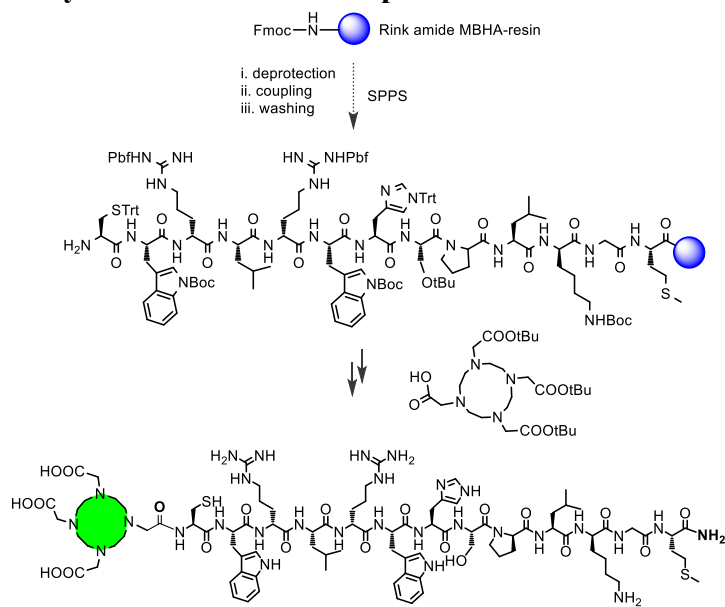

**Scheme S1.** Fmoc-based solid-phase peptide synthesis of CM-1.

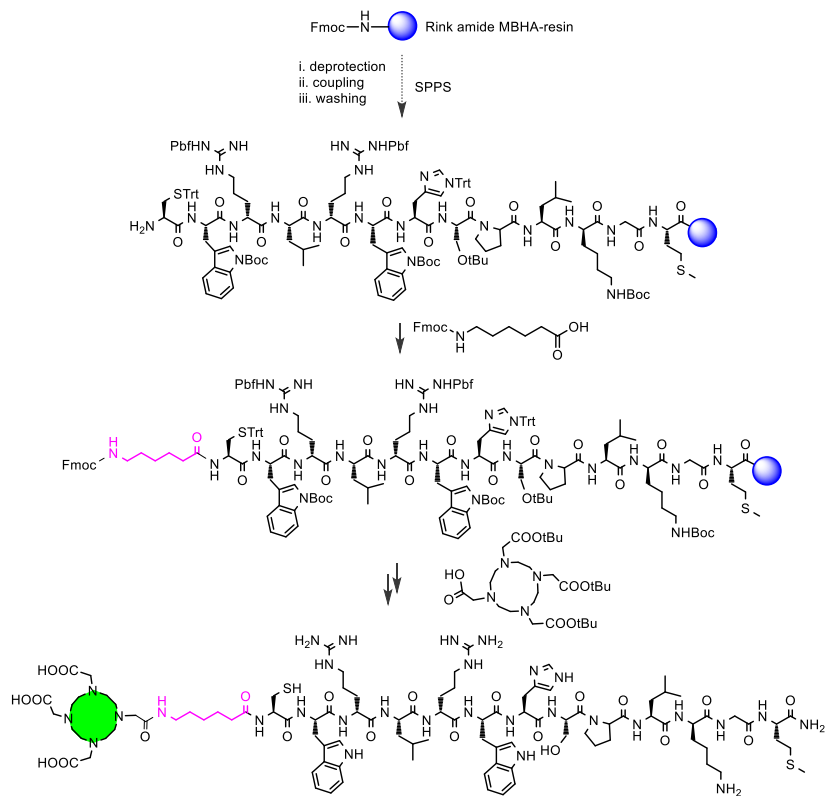

**Scheme S2.** Fmoc-based solid-phase peptide synthesis of CM-2.

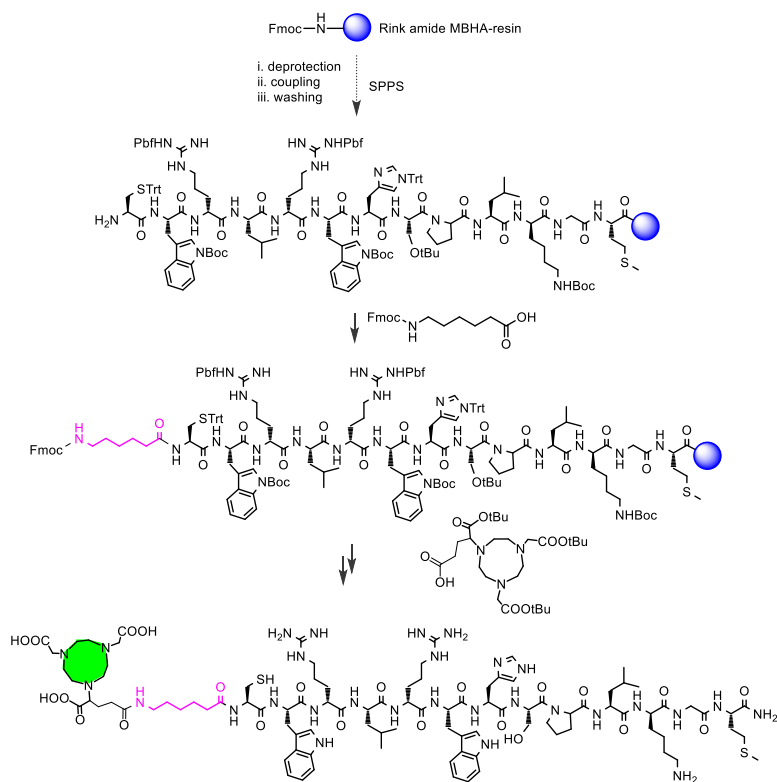

**Scheme S3.** Fmoc-based solid-phase peptide synthesis of CM-3.

## 2. PET quantification of region of interest and ex vivo biodistribution data

**Table S1.** Quantification of radioactivity in the Huh-7 tumors, liver, and kidney from BALB/C nude mice at different time points (57.5 min, 3.5 h, 18 h, 25 h, and 38 h) after i.v. injection of [<sup>64</sup>Cu]CM-2 based on the PET-CT images. The radioactivity in organs was expressed as %injection dose per gram body weight (%ID/g). Data represent the mean ± SD, *n* = 4.

| Time   | PET quantification (%ID/g) |              |             |             |             |             |
|--------|----------------------------|--------------|-------------|-------------|-------------|-------------|
|        | 57.5 min                   | 4 h          | 9 h         | 18 h        | 30 h        | 55 h        |
| Tumor  | 1.70 ± 0.07                | 2.19 ± 0.20  | 2.78 ± 0.22 | 3.45 ± 0.41 | 3.80 ± 0.29 | 4.05 ± 0.37 |
| Liver  | 8.02 ± 0.62                | 7.91 ± 0.90  | 8.01 ± 0.62 | 6.78 ± 0.45 | 6.18 ± 0.24 | 5.05 ± 0.19 |
| Kidney | 13.80 ± 0.80               | 11.04 ± 1.31 | 9.35 ± 0.97 | 5.34 ± 0.40 | 4.14 ± 0.78 | 2.74 ± 0.20 |

**Table S2.** Biodistribution of [<sup>64</sup>Cu]CM-2 at 1, 2, 6, and 18 hours after i.v. injection (*n* = 3 per time point) in Huh-7 tumor-bearing BALB/C nude mice. T/B means tumor-to-blood ratio and T/M means tumor-to-muscle ratio. Data represent the mean ± SD, *n* = 3.

|                | [ <sup>64</sup> Cu]CM-2 |              |              |              |
|----------------|-------------------------|--------------|--------------|--------------|
|                | 1 h                     | 2 h          | 6 h          | 18 h         |
| Blood          | 1.91 ± 0.04             | 1.47 ± 0.16  | 1.28 ± 0.13  | 0.93 ± 0.14  |
| Heart          | 2.08 ± 0.15             | 2.33 ± 0.42  | 2.79 ± 0.16  | 2.13 ± 0.36  |
| Lung           | 3.70 ± 0.27             | 4.14 ± 0.63  | 4.88 ± 0.37  | 4.39 ± 0.47  |
| Liver          | 17.35 ± 2.33            | 17.24 ± 0.97 | 15.05 ± 1.34 | 10.55 ± 0.82 |
| Pancreas       | 1.37 ± 0.19             | 1.27 ± 0.27  | 1.56 ± 0.15  | 1.19 ± 0.09  |
| Spleen         | 2.03 ± 0.09             | 2.08 ± 0.24  | 2.71 ± 0.27  | 2.78 ± 0.28  |
| Kidney         | 50.14 ± 7.26            | 44.66 ± 1.35 | 27.72 ± 2.54 | 12.12 ± 0.80 |
| Stomach        | 2.93 ± 0.64             | 2.25 ± 0.55  | 3.27 ± 1.33  | 2.34 ± 0.18  |
| S. intestine   | 5.79 ± 1.42             | 5.12 ± 1.32  | 3.78 ± 0.57  | 3.52 ± 0.43  |
| Int. lym. node | 2.58 ± 0.43             | 2.02 ± 1.31  | 2.43 ± 0.24  | 1.54 ± 0.12  |
| Muscle         | 0.58 ± 0.05             | 0.50 ± 0.09  | 0.45 ± 0.01  | 0.55 ± 0.32  |
| Bone           | 1.17 ± 0.21             | 1.20 ± 0.21  | 1.23 ± 0.02  | 0.81 ± 0.35  |
| Ovaries        | 1.58 ± 0.02             | 1.23 ± 0.72  | 2.10 ± 0.12  | 1.08 ± 0.17  |
| Bladder        | 2.10 ± 0.50             | 1.54 ± 0.09  | 1.34 ± 0.21  | 1.25 ± 0.19  |
| Huh7           | 3.77 ± 0.43             | 4.23 ± 0.62  | 6.89 ± 1.08  | 6.19 ± 0.69  |
| Brain          | 0.15 ± 0.01             | 0.17 ± 0.02  | 0.21 ± 0.02  | 0.24 ± 0.02  |
| T/B            | 1.97                    | 2.87         | 5.39         | 6.67         |
| T/M            | 6.45                    | 8.42         | 15.19        | 11.18        |

**Table S3.** Quantification of radioactivity in the B16F10 tumors, liver, and kidney from B16F10 tumor-bearing C57BL/6J mice at different time points (57.5 min, 3.5 h, 18 h, 25 h, and 38 h) after i.v. injection of [<sup>64</sup>Cu]CM-2 based on the PET-CT images. The radioactivity in organs was expressed as %injection dose per gram body weight (%ID/g). Data represent mean ± SD, *n* = 4.

| PET quantification (%ID/g) |              |              |             |             |             |
|----------------------------|--------------|--------------|-------------|-------------|-------------|
| Time                       | 57.5 min     | 3.5 h        | 18 h        | 25 h        | 38 h        |
| <b>Tumor</b>               | 1.69 ± 0.13  | 1.95 ± 0.17  | 1.93 ± 0.10 | 1.93 ± 0.15 | 1.75 ± 0.06 |
| <b>Liver</b>               | 9.41 ± 1.40  | 10.53 ± 0.28 | 6.23 ± 0.41 | 6.78 ± 0.36 | 4.48 ± 0.29 |
| <b>Kidney</b>              | 15.07 ± 1.59 | 12.13 ± 0.97 | 4.45 ± 0.58 | 3.75 ± 0.34 | 2.80 ± 0.29 |

**Table S4.** Biodistribution of [<sup>64</sup>Cu]CM-2 at 0.5, 2, 18, and 30 hours after i.v. injection (*n* = 3 per time point) in B16F10 tumor-bearing C57BL/6J mice. T/B means tumor-to-blood ratio and T/M means tumor-to-muscle ratio. Data represent the mean ± SD, *n* = 3.

|                  | [ <sup>64</sup> Cu]CM-2 |              |              |              |
|------------------|-------------------------|--------------|--------------|--------------|
|                  | 0.5 h                   | 2 h          | 18 h         | 30 h         |
| Blood            | 3.15 ± 0.14             | 1.68 ± 0.13  | 0.86 ± 0.08  | 0.96 ± 0.01  |
| Heart            | 2.20 ± 0.25             | 2.09 ± 0.07  | 1.91 ± 0.24  | 2.34 ± 0.14  |
| Lung             | 6.05 ± 0.08             | 7.29 ± 0.20  | 5.14 ± 0.52  | 4.92 ± 0.35  |
| Thymus           | 2.46 ± 0.77             | 2.18 ± 0.18  | 1.31 ± 0.32  | 1.32 ± 0.03  |
| Liver            | 23.92 ± 4.42            | 20.72 ± 0.77 | 11.12 ± 1.61 | 16.03 ± 1.18 |
| Pancreas         | 1.60 ± 0.14             | 1.47 ± 0.10  | 1.03 ± 0.12  | 1.18 ± 0.06  |
| Spleen           | 2.39 ± 0.49             | 1.98 ± 0.07  | 1.33 ± 0.10  | 1.84 ± 0.39  |
| Kidney           | 53.20 ± 7.97            | 39.88 ± 2.10 | 7.58 ± 0.48  | 7.45 ± 0.77  |
| Stomach          | 6.82 ± 0.93             | 6.38 ± 2.33  | 1.20 ± 0.20  | 1.66 ± 0.12  |
| S. intestine     | 12.98 ± 3.76            | 9.76 ± 1.03  | 3.29 ± 0.35  | 2.71 ± 0.11  |
| Intest. lym.node | 6.17 ± 2.46             | 1.64 ± 0.23  | 0.99 ± 0.24  | 0.87 ± 0.05  |
| Muscle           | 0.78 ± 0.10             | 0.46 ± 0.03  | 0.32 ± 0.02  | 0.43 ± 0.03  |
| Bone             | 2.06 ± 0.19             | 1.83 ± 0.08  | 1.29 ± 0.16  | 1.21 ± 0.09  |
| Testis           | 1.33 ± 0.40             | 0.86 ± 0.05  | 0.70 ± 0.08  | 0.80 ± 0.04  |
| B16F10           | 4.67 ± 0.80             | 4.99 ± 0.46  | 3.17 ± 0.27  | 2.98 ± 0.31  |
| Brain            | 0.22 ± 0.02             | 0.23 ± 0.01  | 0.25 ± 0.03  | 0.29 ± 0.02  |
| T/B              | 1.48                    | 2.98         | 3.70         | 3.10         |
| T/M              | 5.96                    | 10.76        | 9.94         | 7.02         |

### 3. Summary of the characteristics of the reported CD133 radiotracers

**Table S5.** Overview of the CD133 radiotracers in references.

| Entry | Tracer name                    | Molecular type | Imaging mode | Tumor model                             | Features                                                                                                               | Reference     |
|-------|--------------------------------|----------------|--------------|-----------------------------------------|------------------------------------------------------------------------------------------------------------------------|---------------|
| 1     | <sup>64</sup> Cu-NOTA-AC133    | mAb            | PET          | U251 and NCH421k gliomas                | High quality image with outstanding tumor-to-background contrast; best imaging window: 24-48 hours after injection     | 1             |
| 2     | <sup>131</sup> I-AC133         | mAb            | SPECT        | LoVo tumors                             | High blood retention, low resolution; best imaging window: 5-7 days after injection                                    | 2             |
| 3     | [ <sup>89</sup> Zr]Zr-HA10     | IgG            | PET          | CWR-R1 <sup>CD133</sup> prostate cancer | High radiochemical purity; best imaging window: 24-72 hours after injection; specific for late-stage AVPC              | 3             |
| 4     | [ <sup>131</sup> I]CD133       | mAb            | SPECT        | HT29 colon cancer cell                  | Low sensitivity; best imaging window: 5-7 days after injection                                                         | 4             |
| 5     | [ <sup>89</sup> Zr]Zr-DFO-RW03 | antibody       | PET          | HT29 colon cancer cell                  | High specific activity and affinity; High liver uptake; best imaging window: 96 hours after injection                  | 5             |
| 6     | <sup>68</sup> Ga-DOTA-LS7      | peptide        | PET          | HCT116 and Lovo cell-derived tumors     | Small molecular size, low liver uptake; fast imaging with the best imaging time: 90 min post-injection                 | 6             |
| 7     | <sup>64</sup> Cu-CM-2          | peptide        | PET          | Huh-7, B16F10, U87MG, and Bowes         | High stability, high tumor-to-background contrast, fast renal excretion; flexible imaging window; high liver retention | Current study |

### 4. Summary of the peptide precursors

**Table S6.** Calculated and Found m/z are presented as [M+1H]<sup>+</sup>/[M/2+H]<sup>+</sup>/[M/3+H]<sup>+</sup>

| Name | Sequence                    | Formula                                                                         | Calculated mass | Found mass |
|------|-----------------------------|---------------------------------------------------------------------------------|-----------------|------------|
| CM-1 | DOTA-CWRLRWHSPLKGM-OH       | C <sub>92</sub> H <sub>142</sub> N <sub>28</sub> O <sub>22</sub> S <sub>2</sub> | 2055.03         | 686.5      |
| CM-2 | DOTA-Ahx-CWRLRWHSPLKGM-OH   | C <sub>98</sub> H <sub>153</sub> N <sub>29</sub> O <sub>23</sub> S <sub>2</sub> | 2169.12         | 1085.6     |
| CM-3 | NODAGA-Ahx-CWRLRWHSPLKGM-OH | C <sub>97</sub> H <sub>150</sub> N <sub>28</sub> O <sub>23</sub> S <sub>2</sub> | 2140.09         | 714.71     |

## 5. Supplementary figures

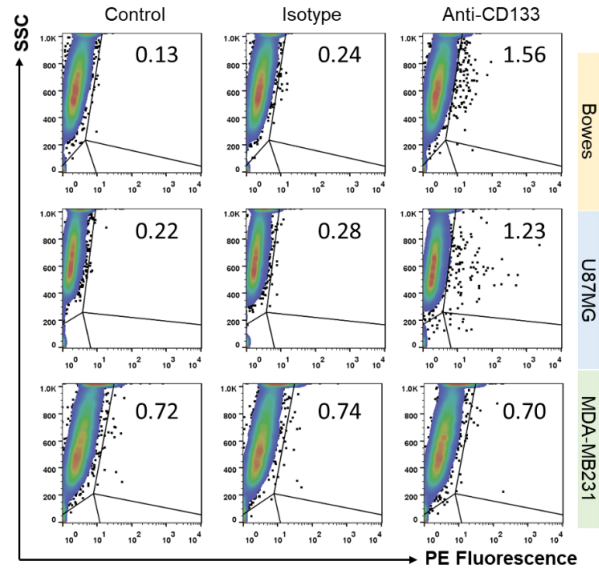

**Figure S1.** Flow cytometry analysis of the expression level of CD133 protein in Bowes, U87MG, and MDA-MB23 cell lines.

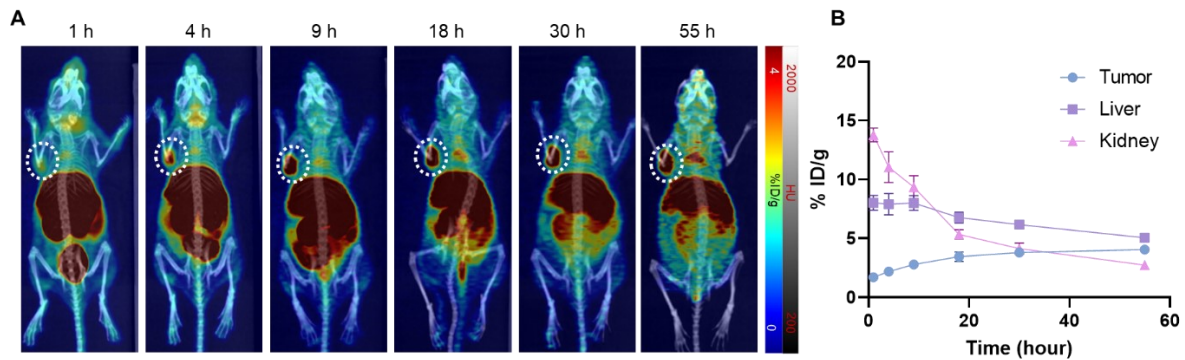

**Figure S2.** (A) Series of co-registered PET-CT maximum intensity projections (MIPs) at different time points postinjection from Huh7-bearing BALB/C nude mice. The white dashed circles indicate the Huh7 tumors. Animals were injected with approximately 17 MBq (0.2 mL, approximately 0.5 nmol of CM-2) of the tracers per mouse via the tail vein. (B) Time-activity curves of the tumor, liver, and kidney. The values were quantified based the PET images. Data represent the mean  $\pm$  SD,  $n = 3$ .

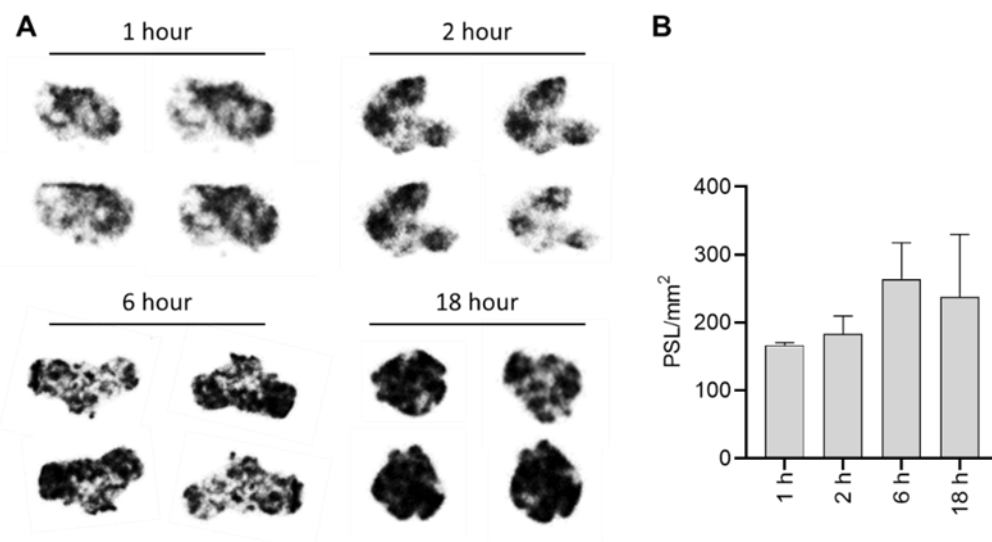

**Figure S3.** (A) *Ex vivo* autoradiography shows the accumulative uptake and distribution of  $[^{64}\text{Cu}]\text{CM-2}$  in Huh-7 tumors at different time points after injection. Representative tumor sections at different time points are from different mice. (B) Quantitative analysis for uptake (PSL/mm<sup>2</sup>; mean  $\pm$  SD, >4 tissue sections for each time points).

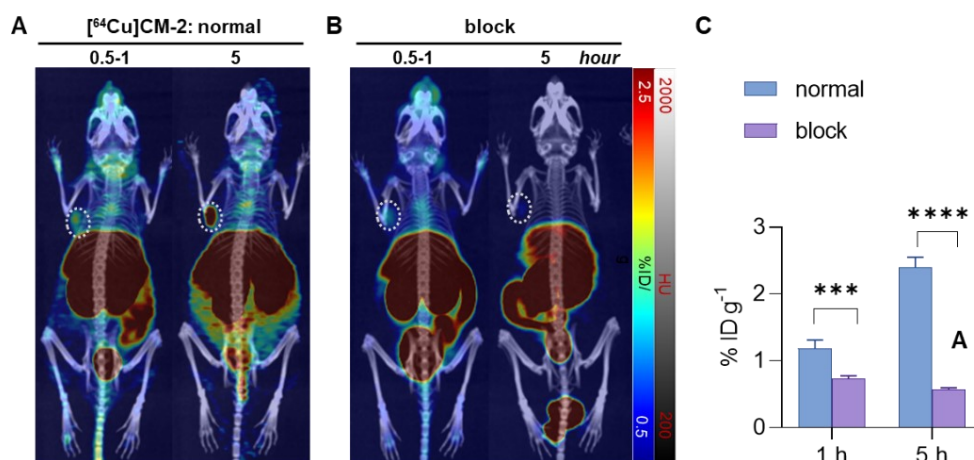

**Figure S4.** (A) Representative co-registered PET-CT MIP images from Huh-7 mice administrated with  $[^{64}\text{Cu}]\text{CM-2}$  (17 MBq, 0.2 mL, approximately 0.5 nmol of CM-2). (B) Representative co-registered MIP images from Huh-7 mice co-administered with  $[^{64}\text{Cu}]\text{CM-2}$  (17 MBq, approximately 0.5 nmol of CM-2) and an excess of CM-2 (0.2 mg per mouse). The white dashed circles indicate the B16F10 tumors. (C) Quantitative analysis of tracer uptake in Huh-7 tumors from normal and block mice. Comparisons were performed using unpaired two-tailed Student's t-test. Data are presented as the mean  $\pm$  SD,  $n = 3$ , \*\*\* $P < 0.001$ , \*\*\*\* $P < 0.0001$ .



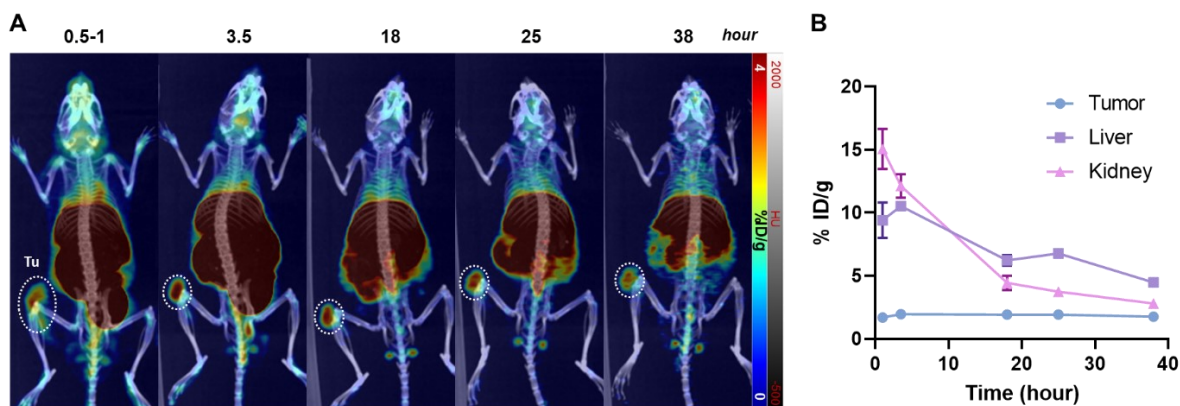

**Figure S5.** (A) Series of co-registered PET-CT MIPs at different time points postinjection from B16F10-bearing C57BL/6J mice. The white dashed circles indicate the B16F10 tumors. Animals were injected with approximately 17 MBq (0.2 mL, approximately 0.5 nmol of CM-2) of the tracers per mouse via the tail vein. (B) Time-activity curves of the tumor, liver, and kidney. The values were quantified based the PET images. Data represent the mean  $\pm$  SD,  $n = 3$ .

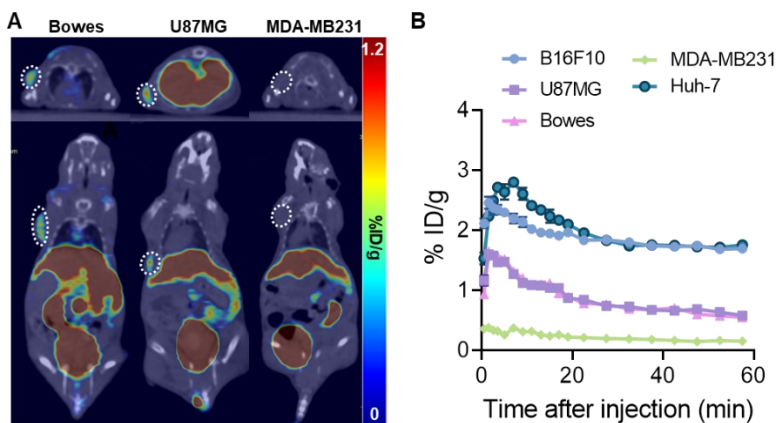

**Figure S6.** (A) Co-registered sectional PET-CT images of mice bearing Huh-7, Bowes, U87MG, or MDA-MB231 xenograft tumors at 35-55 min after i.v. injection of  $[^{64}\text{Cu}]\text{CM-2}$  (17 MBq/mouse, 0.2 mL, approximately 0.5 nmol of CM-2). Upper panels: axial view; down panels: coronal view. White dashed circles indicate the xenograft tumors. (B) PET image-derived region-of-interest (ROI) curves of different tumors from 0 to 55 min after i.v. injection of  $[^{64}\text{Cu}]\text{CM-2}$ . (C) AUC derived from the corresponding ROI curves of tumors in panel B. Statistics analysis was performed using two-way ANOVA analysis, followed by Bonferroni's multiple comparisons test,  $n = 4$ ,  $***P < 0.001$ .

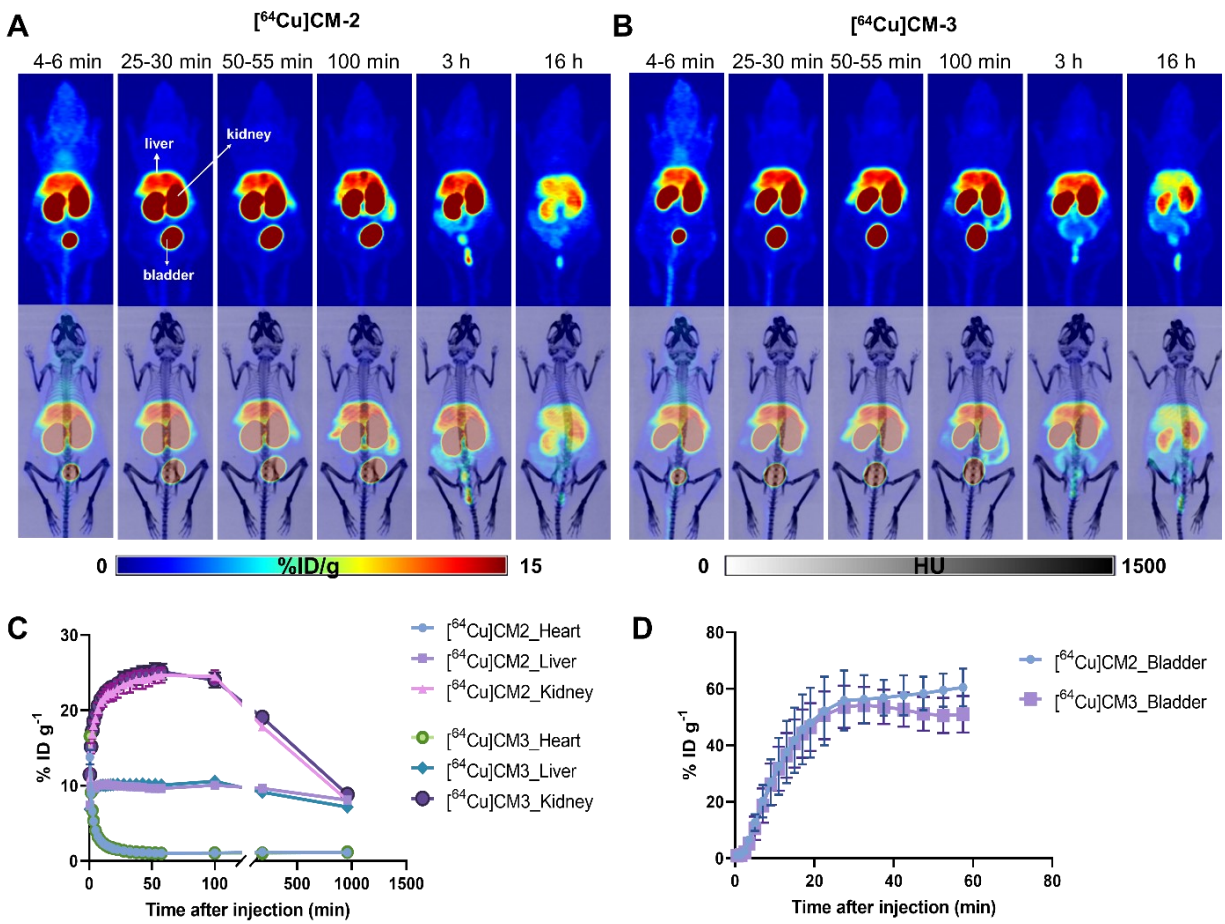

**Figure S7.** Series of MIPs (top panel) and co-registered PET-CT MIPs (bottom panel) at different time points from normal BALB/C nude mice after intravenous injection of (A) [<sup>64</sup>Cu]CM-2 and (B) [<sup>64</sup>Cu]CM-3. Animals were injected with approximately 17 MBq (0.2 mL, approximately 0.5 nmol of CM-2) of the tracers per mouse via the tail vein. (C) Time-activity curves of the heart, liver, and kidney from normal BALB/C nude mice administered with [<sup>64</sup>Cu]CM-2 or [<sup>64</sup>Cu]CM-3. (D) Time-activity curves of the bladder. Data represent the mean ± SD, *n* = 3.

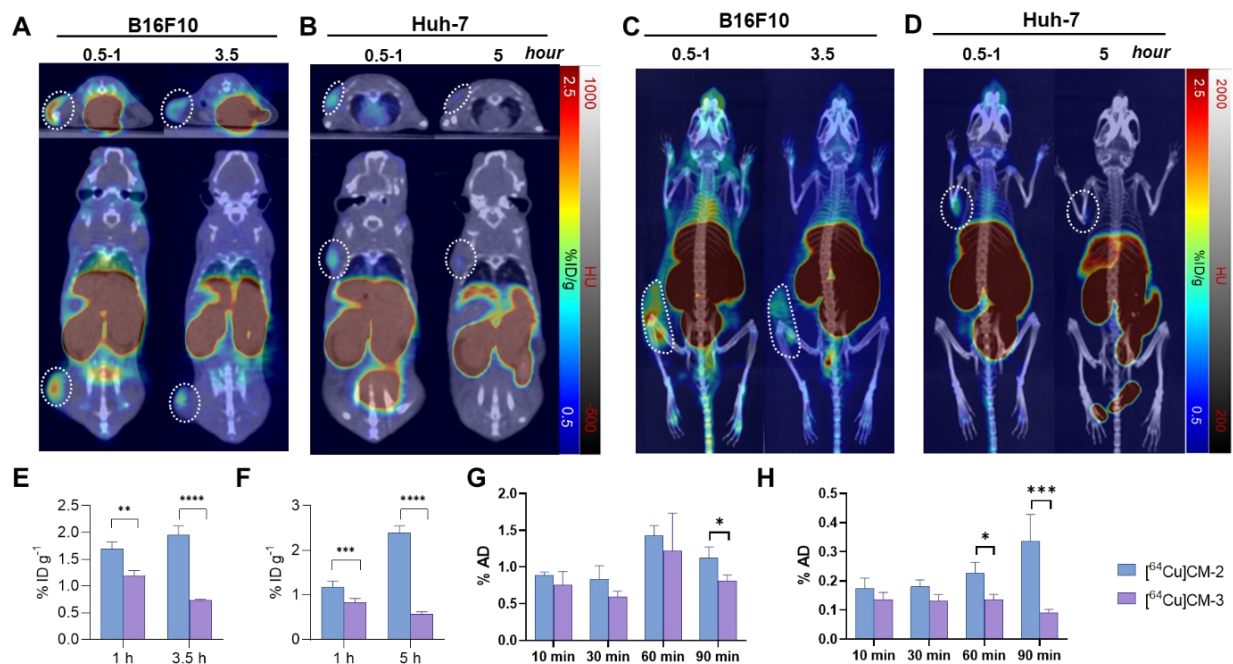

**Figure S8.** Series of co-registered PET-CT images of (A) B16F10-bearing C57BL/6J and (B) Huh-7-bearing BALB/C nude mice at different time points postinjection of  $[^{64}\text{Cu}]\text{CM-3}$ . The white dashed circles indicate the B16F10 tumors. Animals were injected with approximately 17 MBq (0.2 mL, approximately 0.5 nmol of CM-2) of the tracers per mouse via the tail vein. (C and D) The corresponding co-registered PCT-CT MIPs of A and B, respectively. Comparison of quantitative uptake of  $[^{64}\text{Cu}]\text{CM-2}$  and  $[^{64}\text{Cu}]\text{CM-3}$  in B16F10 (E) and Huh-7 (F) at different time point after injection. Comparison of cellular uptake of  $[^{64}\text{Cu}]\text{CM-2}$  and  $[^{64}\text{Cu}]\text{CM-3}$  in Huh-7 tumor cells (G) and B16F10 tumor cells (H) after co-incubation for different periods. Comparisons were performed using unpaired two-tailed Student's t-test. Data are presented as the mean  $\pm$  SD,  $n = 3$ , \*\*\* $P < 0.001$ , \*\*\*\* $P < 0.0001$ .

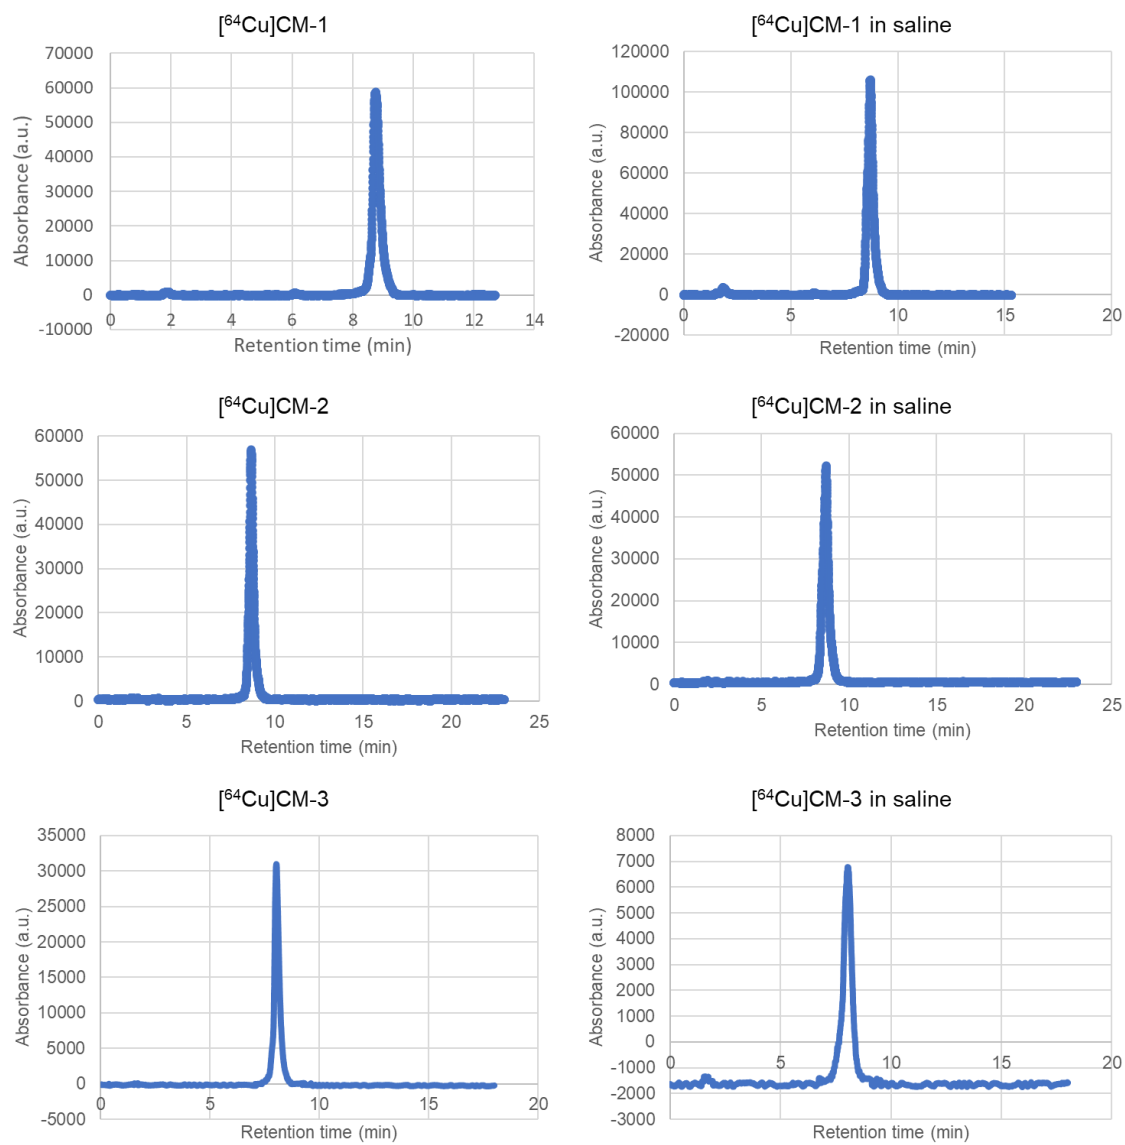

**Figure S9.** Radiosynthesis of  $[^{64}\text{Cu}]\text{CM-1}$ ,  $[^{64}\text{Cu}]\text{CM-2}$ , and  $[^{64}\text{Cu}]\text{CM-3}$ , and their stability in saline

## 6. Supplementary HPLC curves and mass spectra

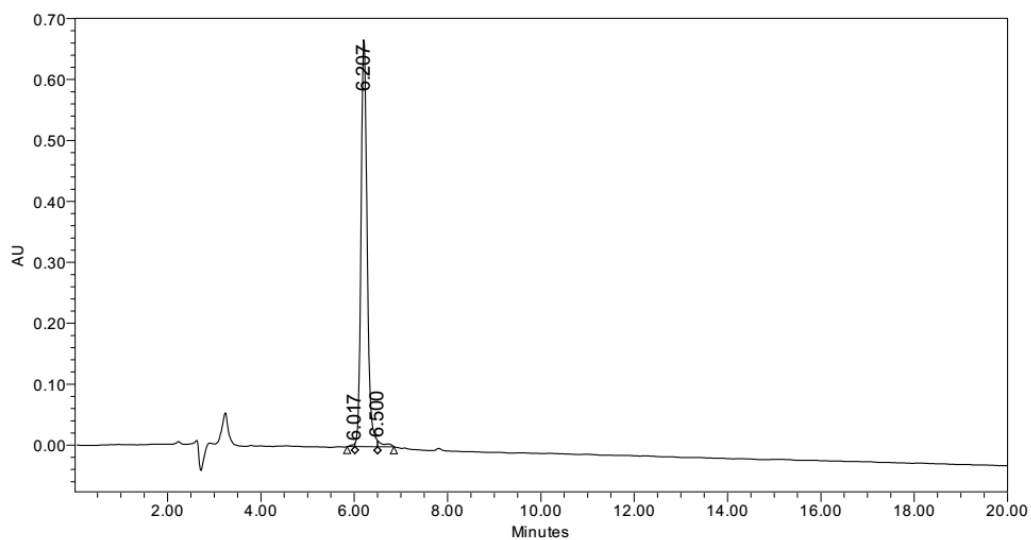

Figure S10. HPLC chromatogram of CM-1

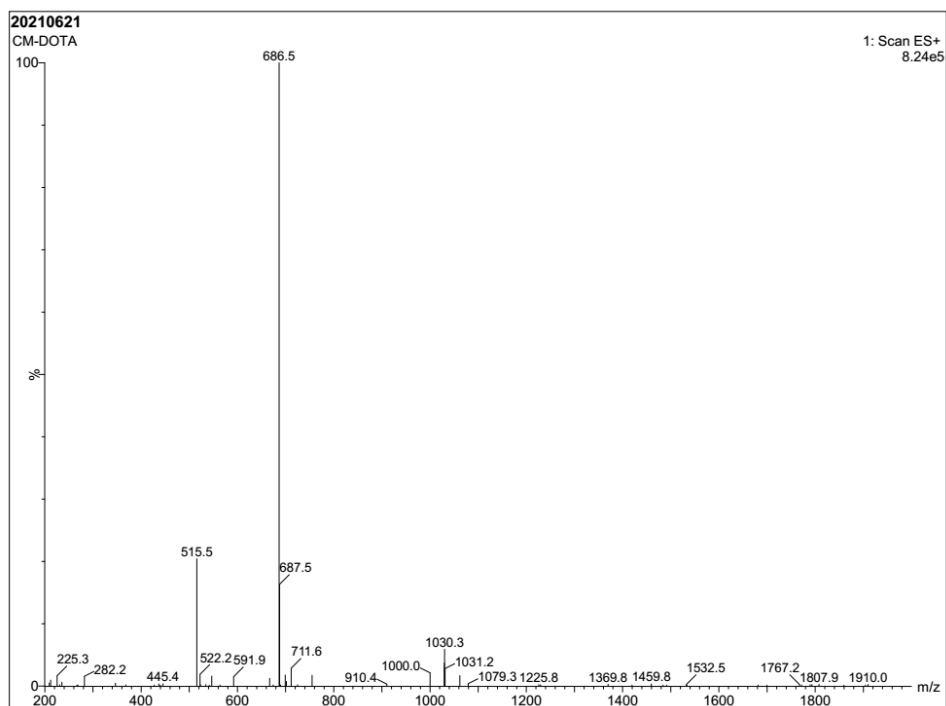

Figure S11. Mass spectrum of CM-1

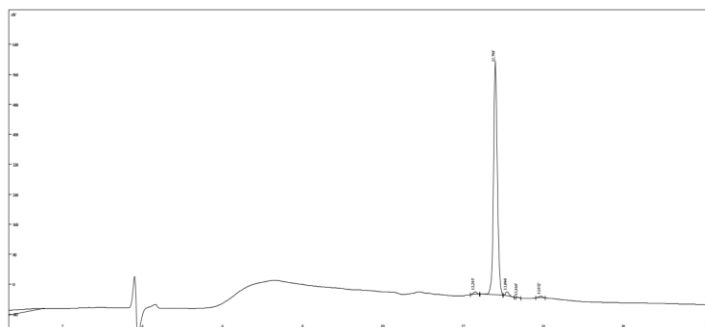

**Figure S12.** HPLC chromatogram of CM-2.

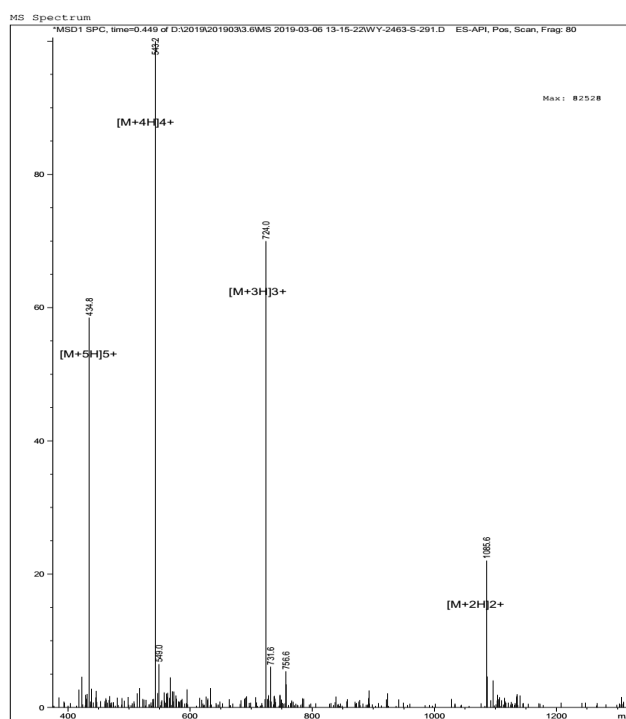

**Figure S13.** Mass spectrum of CM-2

(a) ESI full mass

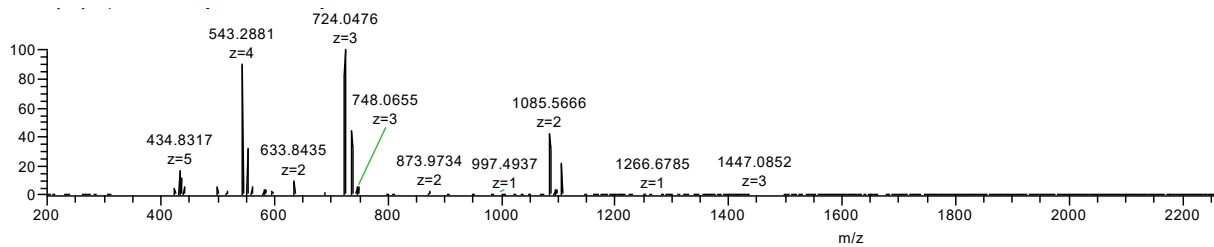

(b) Analysis of  $[M/2+H]^{2+}$

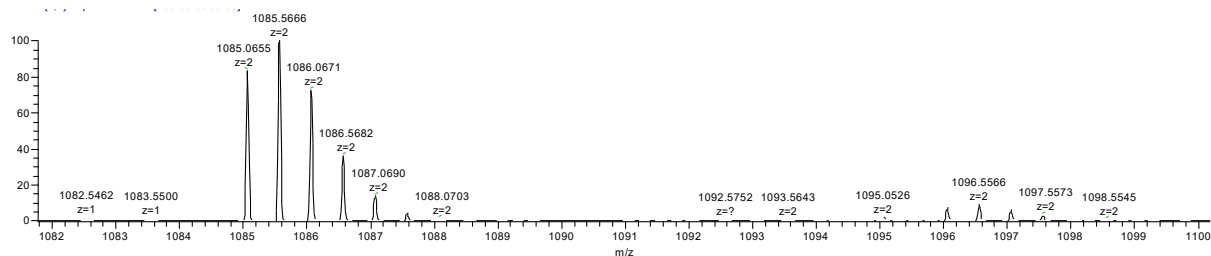

Figure S14. HRMS of CM-2.

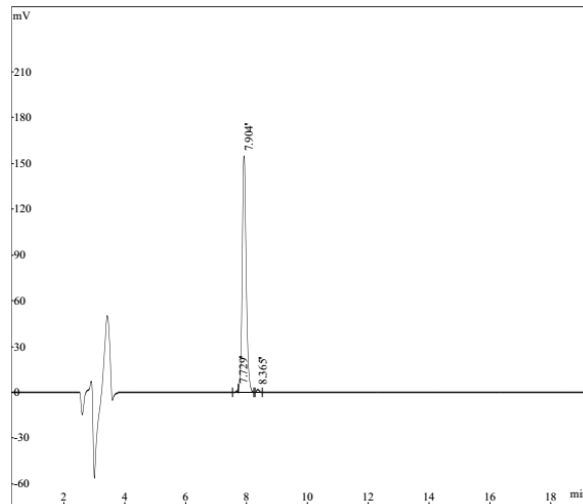

Figure S15. HPLC chromatogram of CM-3

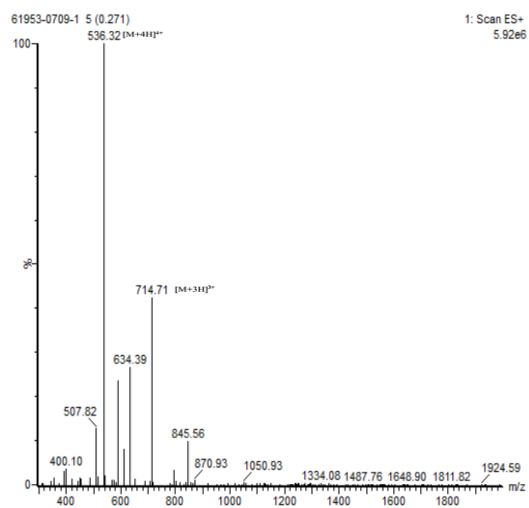

Figure S16. Mass spectrum of CM-3

(a) ESI Full mass

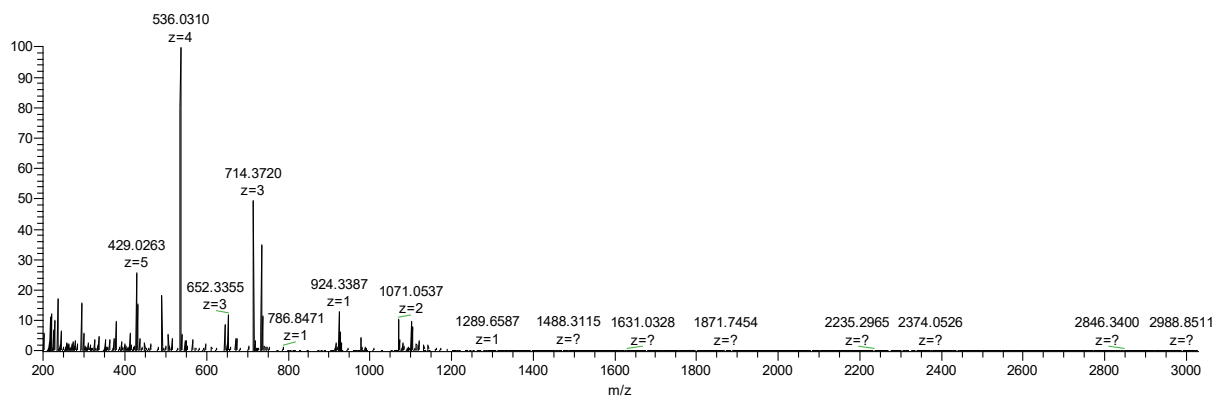

(b) Analysis of  $[M/2+H]^{2+}$

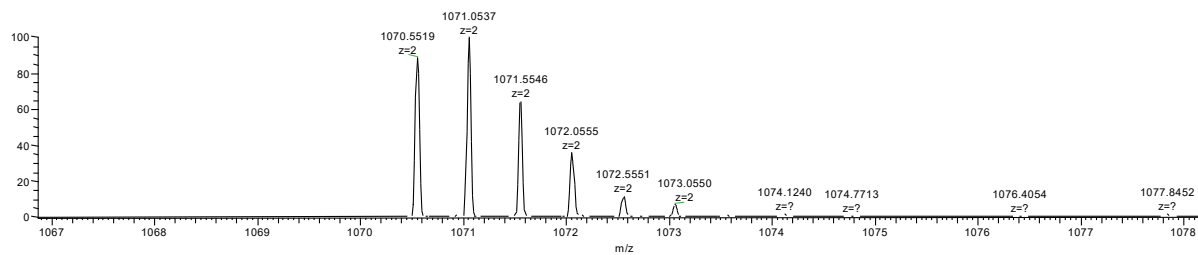

Figure S17. HRMS of CM-3.



## Reference:

1. Gaedicke, S.; Braun, F.; Prasad, S.; Machein, M.; Firat, E.; Hettich, M.; Gudihal, R.; Zhu, X.; Klingner, K.; Schüler, J.; Herold-Mende, C. C.; Grosu, A.-L.; Behe, M.; Weber, W.; Mäcke, H.; Niedermann, G., Noninvasive positron emission tomography and fluorescence imaging of CD133<sup>+</sup> tumor stem cells. *Proc. Natl. Acad. Sci. U. S. A.* **2014**, *111* (6), E692-E701.
2. Lang, J.; Lan, X.; Liu, Y.; Jin, X.; Wu, T.; Sun, X.; Wen, Q.; An, R., Targeting cancer stem cells with an <sup>131</sup>I-labeled anti-AC133 monoclonal antibody in human colorectal cancer xenografts. *Nucl. Med. Biol.* **2015**, *42* (5), 505-512.
3. Glumac, P. M.; Gallant, J. P.; Shapovalova, M.; Li, Y.; Murugan, P.; Gupta, S.; Coleman, I. M.; Nelson, P. S.; Dehm, S. M.; LeBeau, A. M., Exploitation of CD133 for the Targeted Imaging of Lethal Prostate Cancer. *Clin. Cancer Res.* **2020**, *26* (5), 1054-1064.
4. She, X.; Qin, S.; Jing, B.; Jin, X.; Sun, X.; Lan, X.; An, R., Radiotheranostic Targeting Cancer Stem Cells in Human Colorectal Cancer Xenografts. *Mol. Imaging Biol.* **2020**, *22* (4), 1043-1053.
5. Wyszatko, K.; Valliant, J.; Sadeghi, S.; Singh, S., PET imaging cancer stem cells using a novel zirconium-89 labelled fully human anti-CD133 antibody. *J. Nucl. Med.* **2021**, *62* (supplement 1), 154-154.
6. Liu, Y.; Yao, X.; Wang, C.; Wang, M.; Wang, Y.; Ye, M.; Liu, Y., Peptide-based <sup>68</sup>Ga-PET radiotracer for imaging CD133 expression in colorectal cancer. *Nucl. Med. Commun.* **2021**.
